# Supplementary material for: Effect of Multidirectional Forging and Aging Treatment on Wear Properties of ZK61 Alloy
Source: MDPI journal article supplement (doi:10.3390/ma17020523), 2024-01-22
Supplement: s1 [file s1]

# Effect of Multi-Directional Forging and Aging Treatment on Wear Properties of ZK61 Alloy

Xuhui Zhang <sup>1</sup>, Jian Xu <sup>1,\*</sup>, Wenyu He <sup>1</sup> and Jingjing Jia <sup>2</sup>

<sup>1</sup> College of Materials Science and Engineering, North University of China, Taiyuan 030051, China

<sup>2</sup> College of Mechanical and Electrical Engineering, North University of China, Taiyuan 030051, China

\* Correspondence : 20160608@nuc.edu.cn

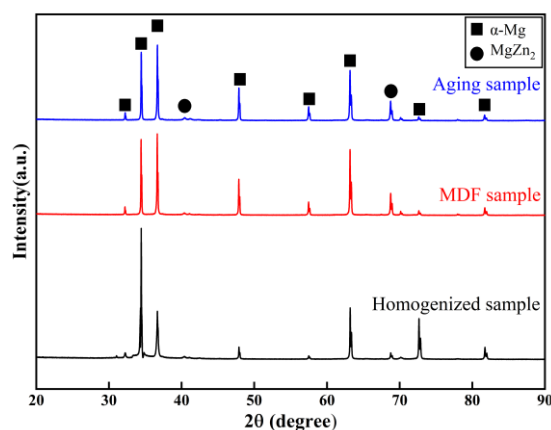

**Figure S1** X-ray diffraction patterns of different samples.

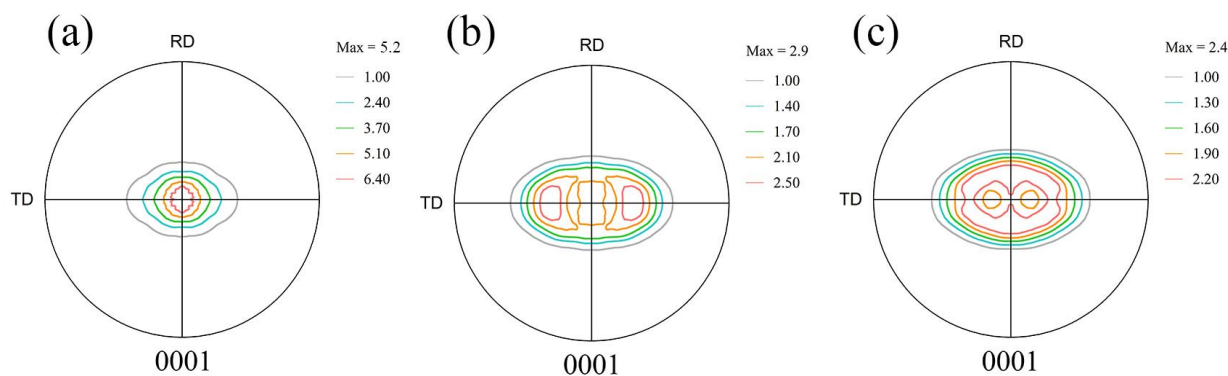

**Figure S2** The macro-texture of three samples: (a) homogenized sample; (b) MDF sample; (c) aged sample

Figure S1 shows the X-ray diffraction (XRD) patterns of the experimental sample under the different treatment methods. It is obvious to find that the samples are consisting of Mg matrix and MgZn<sub>2</sub> phases. Because there is no new precipitation in the three samples, it does not impact the tribological properties. Figure S2 shows the macro-texture of three samples, it is found that the change of texture is relatively small. Therefore, the influence of macro-texture on its tribological properties is not analyzed.
